# Supplementary material for: A new species of Gulo from the Early Pliocene Gray Fossil Site (Eastern United States); rethinking the evolution of wolverines
Source: PeerJ. 2018 Apr 18;6:e4648. doi: 10.7717/peerj.4648 (PMC5910791; doi:10.7717/peerj.4648)
Supplement: Table S1 — Data were derived from a wide range of literature sources, as well as occurrences listed in the MIOMAP/FAUNMAP Databases (Carrasco et al., 2007; Graham & Lundeliu Jr, 2010; http://www.ucmp.berkeley.edu/neomap/) and NOW Database (Fortelius, 2013; http://pantodon.science.helsinki.fi/now/). [file peerj-06-4648-s002.xlsx]

## Sheet: Gulo fossil occurrences
Species	Reference	Locality	State / Province	Country	Age	Mammal Age / Stage	Min Age	Max Age	Coordinates
Gulo sudorus	current paper (Samuels et al. 2018)	Gray Fossil Site	Tennessee	USA	latest Miocene or early Pliocene	Hemphillian or Blancan	4.5	4.9	36.4° N, 82.5° W
Gulo gulo	FAUNMAP database	Fairbanks	Alaska	USA	late Pleistocene	Rancholabrean			654500	1462500
Gulo gulo	FAUNMAP database	Tanana River Cave	Alaska	USA	Pleistocene	Rancholabrean			641800	1461500
Gulo gulo	FAUNMAP database	Lost Chicken Creek	Alaska	USA	late Pleistocene	Rancholabrean			640300	1415200
Gulo sp.	Cassiliano 1999	Vallecito Creek Local Fauna	California	USA	Pleistocene	Irvingtonian	0.78	2.58	325230	1160730
Gulo gulo	Hager 1972	Chimney Rock Animal Trap	Colorado	USA	Holocene		0.00145	0.01198	405200	1054500
Gulo sp.	Barnosky et al 2004	Porcupine Cave	Colorado	USA	middle Pleistocene	Irvingtonian	0.01	0.4	384345	1055141
Gulo gulo	Anderson 1998	Moonshiner Cave	Idaho	USA	Holocene		0.008	0.01	432200	1123700
Gulo gulo	Anderson 1998	Middle Butte Cave	Idaho	USA	Holocene		1e-06	0.005175	432200	1123700
Gulo gulo	Anderson 1998	Grasshopper Trail Cave	Idaho	USA	Holocene				431759	1110744
Gulo gulo	Anderson 1998	Booth Canyon Local Fauna	Idaho	USA	Pleistocene	Rancholabrean			431759	1110744
Gulo gulo	Anderson 1998	Duck Point	Idaho	USA	Pleistocene	Rancholabrean	0.015	0.072	423700	1125200
Gulo gulo	Anderson 1998	Jaguar Cave No. 2	Idaho	USA	Holocene		0.007	0.01037	441653	1125455
Gulo gulo	Anderson 1998	Weston Canyon Rockshelter	Idaho	USA	Holocene		0.002	0.00374	420000	1120000
Gulo gulo	FAUNMAP database	Havana Village Group	Illinois	USA	Holocene		0.00165	0.0022	401648	900447
Gulo gulo	Gidley 1913, Hall 1936	Cumberland Cave	Maryland	USA	Pleistocene	Irvingtonian			39.6° N, 78.7° W
Gulo gulo	FAUNMAP database	Montana Ice Cave	Montana	USA	Holocene		1e-06	0.01	464500	1090000
Gulo gulo	FAUNMAP database	Shield Trap	Montana	USA	Holocene		0.00127	0.00754	450700	1081500
Gulo gulo	FAUNMAP database	Smith Springs	Nebraska	USA	late Pleistocene	Rancholabrean	0.01	0.035	423834	1003435
Gulo gulo	FAUNMAP database	Smith Falls Local Fauna	Nebraska	USA	late Pleistocene	Rancholabrean	0.01	0.11	424500	1000700
Gulo gulo	FAUNMAP database	25FT17	Nebraska	USA	Holocene		0.00071	0.000865	402240	1001245
Gulo gulo	Mead and Mead 1989	Snake Creek Burial Cave	Nevada	USA	late Pleistocene	late Rancholabrean to early Holocene (15100 +/- 700 yr BP to 9460 +/- 160 yr BP)	0.00946	0.0151	385200	1140700
Gulo gulo	FAUNMAP database	Connley Cave No. 4	Oregon	USA	late Pleistocene to Holocene		0.00915	0.018	431500	1210000
Gulo gulo	FAUNMAP database	Robinette Rockshelter	Oregon	USA	Holocene		0.0002	0.004	444500	1170000
Gulo gulo	FAUNMAP database	Meadowcroft Rockshelter	Pennsylvania	USA	early Holocene		0.009695	0.009695	410100	1092200
Gulo gulo	Gidley and Gazin 1938	Port Kennedy Cave	Pennsylvania	USA	Pleistocene	Irvingtonian			400611	752530
Gulo gulo	FAUNMAP database	Nielson's Well Cave	Utah	USA	late Pleistocene	Rancholabrean			413730	1113730
Gulo gulo	Martin et al 1977, Wang and Martin 1993	Natural Trap Cave	Wyoming	USA	late Pleistocene	Rancholabrean	0.0155	0.11	445200	1080700
Gulo gulo	Long 1971	Little Box Elder Cave	Wyoming	USA	late Pleistocene to Early Holocene	Rancholabrean and early Holocene	0.00925	0.024	423700	1053700
Gulo gulo	FAUNMAP database	48TE1107	Wyoming	USA	Holocene		1e-06	0.0005	435200	1103700
Gulo gulo	FAUNMAP database	Pine Springs	Wyoming	USA	Holocene		0.009695	0.009695	410100	1092200
Gulo gulo	FAUNMAP database	Eagle Cave	Alberta	Canada	Holocene		0.00013	0.033	493810	1143824
Gulo gulo	FAUNMAP database	Rat's Nest Cave	Alberta	Canada	Holocene		0.00013	0.033	493810	1143824
Gulo gulo	FAUNMAP database	Charlie Lake Cave	British Columbia	Canada	Holocene		1e-06	0.0044	561635	1205615
Gulo sp.	FAUNMAP database	Boardwalk	British Columbia	Canada	Holocene		0.0001	0.005	541720	1302216
Gulo sp.	FAUNMAP database	Goose Point	British Columbia	Canada	Holocene		0.00017	0.00079	522940	1252030
Gulo sp.	FAUNMAP database	Kain	Manitoba	Canada	Holocene		0.00196	0.00421	495130	994500
Gulo sp.	FAUNMAP database	Lockport	Manitoba	Canada	Holocene		0.000545	0.000725	500500	965500
Gulo sp.	FAUNMAP database	Pas Reserva	Manitoba	Canada	Holocene		0.00313	0.00325	534935	1011530
Gulo sp.	FAUNMAP database	Clachan	Northwest Territories	Canada	Holocene		0.00078	0.00113	681000	1145000
Gulo sp.	FAUNMAP database	Gupuk	Northwest Territories	Canada	Holocene		0.00065	0.00081	692045	1340238
Gulo sp.	FAUNMAP database	McKinley Bay	Northwest Territories	Canada	Holocene		0.00034	0.00048	700344	1305838
Gulo gulo	FAUNMAP database	Bight	Nunavut	Canada	Holocene		0.00377	0.00391	790622	760718
Gulo sp.	FAUNMAP database	Nadlok	Nunavut	Canada	Holocene		0.000305	0.000585	661603	1101435
Gulo gulo	FAUNMAP database	Tasealuk	Nunavut	Canada	Holocene				725005	950915
Gulo sp.	FAUNMAP database	Duck Bay	Ontario	Canada	Holocene		0.0003	0.0007	492000	843000
Gulo sp.	FAUNMAP database	Roebuck	Ontario	Canada	Holocene		0.00046	0.00066	444900	753600
Gulo sp.	FAUNMAP database	Tipperary Creek	Saskatchewan	Canada	Holocene		0.0009	0.0011	521312	1063535
Gulo gulo	Harrington 1977, Bryant 1987	Locality CRH-11 - Old Crow Basin	Yukon	Canada	Pleistocene				674925	1395040
Gulo gulo	Harrington 1977, Bryant 1987	Locality 11A - Old Crow Basin	Yukon	Canada	late Pleistocene to Holocene		0.00207	0.042	674910	1395415
Gulo gulo	Harrington 1977, Bryant 1987	Locality 11AN - Old Crow Basin	Yukon	Canada	Pleistocene				674910	1395415
Gulo gulo	Harrington 1977, Bryant 1987	Locality CRG-12 - Old Crow Basin	Yukon	Canada	Pleistocene				675007	1395145
Gulo gulo	Harrington 1977, Bryant 1987	Locality CRH-14N - Old Crow Basin	Yukon	Canada	Pleistocene				675050	1395100
Gulo gulo	Harrington 1977, Bryant 1987	Locailty CRH-20 - Old Crow Basin	Yukon	Canada	Pleistocene				680146	1393415
Gulo gulo	Harrington 1977, Bryant 1987	Locality 65 - Old Crow Basin	Yukon	Canada	Pleistocene				674910	1395415
Gulo gulo	Harrington 1977, Bryant 1987	Locality CRH-29 - Old Crow Basin	Yukon	Canada	Pleistocene				681025	1395833
Gulo gulo	Harrington 1977, Bryant 1987	Locality CRH-66 - Old Crow Basin	Yukon	Canada	late Pleistocene	Rancholabrean	0.0295	0.0307	680258	1393435
Gulo gulo	Harrington 1977, Bryant 1987	Locality CRH-22 - Old Crow Basin	Yukon	Canada	Pleistocene				680244	1393415
Gulo gulo	Harrington 1977, Bryant 1987	Locality CRH-74 - Old Crow Basin	Yukon	Canada	Pleistocene				674805	1395510
Gulo gulo	Harrington 1977, Bryant 1987	Locality 75 - Old Crow Basin	Yukon	Canada	Pleistocene				674910	1395415
Gulo gulo	Harrington 1977, Bryant 1987	Locality 81 - Old Crow Basin	Yukon	Canada	Pleistocene				674910	1395415
Gulo gulo	Harrington 1977, Bryant 1987	Locality CRH-44 - Old Crow Basin	Yukon	Canada	late Pleistocene	Rancholabrean	0.054	0.054	681248	1400041
Gulo gulo	FAUNMAP database	Sixtymile Locality 3	Yukon	Canada	late Pleistocene	Rancholabrean	0.02078	0.0494	640200	1404500
Gulo sp.	FAUNMAP database	Washout	Yukon	Canada	Holocene		0.00026	0.0004	693414	1385314
Gulo gulo	Döppes 2001	Salzofenhöhle	Steiermark	Austria	Pleistocene		0.0312	0.0491	13° 56' 44'' E, 47° 42' 35'' N
Gulo gulo	Döppes 2001	Brettsteinbärenhöhle	Steiermark	Austria	Pleistocene		0.0376	0.044	13° 59' E, 47 °37' 19'' N
Gulo gulo	Döppes 2001	Drachenhöhle bei Mixnitz	Steiermark	Austria	Pleistocene		0.02504	0.02504	15°22' 55'' E, 47°19' 33'' N
Gulo gulo	Döppes 2001	Tropfsteinhöhle	Steiermark	Austria	Pleistocene		0.017	0.027	15°20' 17'' E, 47°13' 29'' N
Gulo gulo	Döppes 2001	Tunnelhöhle	Steiermark	Austria	Pleistocene		0.01808	0.03881	15° 30' 47'' E, 47° 14' 39'' N
Gulo gulo	Döppes 2001	Katerloch bei Weiz	Steiermark	Austria	Pleistocene				15° 20' 17'' E, 47° 13' 29'' N
Gulo gulo	Döppes 2001	Mithrasgrotte	Burgenland	Austria	Pleistocene				16° 23' E, 47° 18' N
Gulo gulo	Döppes 2001	Teufelslucke bei Eggenburg	Niederösterreich	Austria	Pleistocene		0.023	0.04017	15° 51' 21'' E, 48° 40' 20'' N
Gulo gulo	Döppes 2001	Grubgraben bei Kammern	Niederösterreich	Austria	Pleistocene		0.01817	0.01896	15° 43' 35'' E, 48° 28' 40'' N
Gulo gulo	Döppes 2001	Krems-Wachtberg	Niederösterreich	Austria	Pleistocene		0.0274	0.0274	15° 35' 58'' E, 48° 24' 56'' N
Gulo gulo	Döppes 2001	Krems-Hundssteig	Niederösterreich	Austria	Pleistocene		0.0355	0.0355	15° 35' 35'' E, 48° 24' 51'' N
Gulo gulo	Döppes 2001	Willendorf in der Wachau	Niederösterreich	Austria	Pleistocene		0.02383	0.0417	15° 24' 14'' E, 48° 19' 26'' N
Gulo gulo	Döppes 2001	Chaleux		Belgium	Pleistocene
Gulo gulo	Döppes 2001	Höhlen bei Liège		Belgium	Pleistocene
Gulo gulo	Döppes 2001	Höhle Freyer		Belgium	Pleistocene
Gulo gulo	Döppes 2001	Trou des Nutons bei Verlaine		Belgium	Pleistocene
Gulo gulo	Döppes 2001	Trou du Moulin à Goyet		Belgium	Pleistocene
Gulo gulo	Döppes 2001	Pećina na Saftici		Croatia	Pleistocene
Gulo gulo	Döppes 2001	Pećina u Brini		Croatia	Pleistocene		0.018388	0.018388
Gulo gulo	Döppes 2001	Pisana Stina		Croatia	Pleistocene
Gulo gulo	Döppes 2001	Pula		Croatia	Pleistocene
Gulo gulo	Döppes 2001	Šandalja II		Croatia	Pleistocene		0.01083	0.0278	13° 53' 48'' E, 44° 52' 57'' N
Gulo gulo	Döppes 2001	Velika pećina		Croatia	Pleistocene		0.02645	0.03385	16° 02' 22'' E, 46° 17' 10'' N
Gulo gulo	Döppes 2001	Vindija		Croatia	Pleistocene		0.0185	0.1141	16° 44' 38'' E, 46° 19' 12'' N
Gulo gulo	Döppes 2001	Dolní Věstonice		Czech Republic	Pleistocene
Gulo gulo	Döppes 2001	Kůlna		Czech Republic	Pleistocene
Gulo gulo	Diedrich 2006	Praha		Czech Republic	Pleistocene	Weichselian	0.01	0.115	50°5'16'" N, 14°25'13" E
Gulo gulo	Döppes 2001	Předmost		Czech Republic	Pleistocene
Gulo gulo	Döppes 2001	Šipka		Czech Republic	Pleistocene
Gulo gulo	Döppes 2001	Slouper Höhle		Czech Republic	Pleistocene
Gulo gulo	Döppes 2001	Svédův stůl		Czech Republic	Pleistocene
Gulo gulo	Döppes 2001	Vypustek		Czech Republic	Pleistocene
Gulo sp.	Delagnes et al 1999	Artenac 'Deuxieme macromammal Assemblage', Commune de Saint-Mary, Charente	Poitou-Charentes	France	middle Pleistocene	Mindel-Riss or Riss (0.7 - 0.5 Ma)	0.5	0.7	46.0° N, 0.2° E
Gulo gulo	Döppes 2001	Cèdres	Var	France	Pleistocene
Gulo gulo	Döppes 2001	Châteauneuf	Charente	France	Pleistocene
Gulo gulo	Döppes 2001	Fouvent	Haute-Saône	France	Pleistocene
Gulo gulo	Döppes 2001	Fustié	Ariège	France	Pleistocene
Gulo gulo	Döppes 2001	Grospierre	Rhône-Alpes	France	Pleistocene
Gulo gulo	Döppes 2001	Jaurens	Corrèze	France	Pleistocene
Gulo gulo	Döppes 2001	L’Adaouste	Bouches-du Rhône	France	Pleistocene
Gulo gulo	Döppes 2001	L’Observatoire	Alpes-Maritime	France	Pleistocene
Gulo gulo	Bonifay and Bonifay 1963	La grotte de l'Escale bed H, Saint-Esteve-Janson, Bouches du Rhone	Provence	France	middle Pleistocene	Biharian (0.8 - 0.7 Ma)	0.7	0.8	43.7° N, 5.4° E
Gulo gulo	Mourer-Chauvire 2003	La Fage	Corrèze	France	Pleistocene		0.242	0.301	45°15'11'" N, 2°12'0" E
Gulo gulo	Döppes 2001	Labastide	Haute-Pyrénées	France	Pleistocene
Gulo gulo	Döppes 2001	Lherm	Ariège	France	Pleistocene
Gulo gulo	Döppes 2001	Placard	Charente	France	Pleistocene
Gulo gulo	Döppes 2001	Rinxent	Pas-de-Calais	France	Pleistocene
Gulo gulo	Döppes 2001	Santenay	Cote-d’Or	France	Pleistocene
Gulo gulo	Döppes 2001	Solutré	Saône-et-Loire	France	Pleistocene
Gulo gulo	Döppes 2001	Trois-Frères	Ariège	France	Pleistocene
Gulo gulo	Döppes 2001	Vallescure	Vaucluse	France	Pleistocene
Gulo gulo	Döppes 2001	Verzé	Saône-et-Loire	France	Pleistocene
Gulo gulo	Döppes 2001	Vilhonneur	Charente	France	Pleistocene
Gulo gulo	Döppes 2001	Villereversure	Ain	France	Pleistocene
Gulo gulo	Döppes 2001	Völklinshofen	Alsace	France	Pleistocene
Gulo gulo	Döppes 2001	Altendorf	Bayern	Germany	Pleistocene
Gulo gulo	Döppes 2001	Amstetten	Baden-Württemberg	Germany	Pleistocene
Gulo gulo	Döppes 2001	Aufhausener Höhle		Germany	Pleistocene
Gulo gulo	Döppes 2001	Baumannshöhle		Germany	Pleistocene
Gulo gulo	Döppes 2001	Brumberg	Bayern	Germany	Pleistocene
Gulo sp.	Franzen 2000	Dorn-Dürkheim 3		Germany	Pleistocene	Matuyama - Biharian	0.78	1.95	49°46'6" N, 8°16'9" E
Gulo gulo	Döppes 2001	Dürrloch	Bayern	Germany	Pleistocene
Gulo gulo	Döppes 2001	Egeln	Sachsen-Anhalt	Germany	Pleistocene
Gulo gulo	Döppes 2001	Eppelsheim	Rheinland-Pfalz	Germany	Pleistocene
Gulo gulo	Döppes 2001	Eulenloch		Germany	Pleistocene
Gulo gulo	Döppes 2001	Geißenklösterle	Baden-Württemberg	Germany	Pleistocene
Gulo gulo	Döppes 2001	Göpfelsteinhöhle		Germany	Pleistocene
Gulo gulo	Döppes 2001	Grubenloch		Germany	Pleistocene
Gulo gulo	Döppes 2001	Haldenstein	Baden-Württemberg	Germany	Pleistocene
Gulo gulo	Döppes 2001	Heigelsbachtal	Bayern	Germany	Pleistocene
Gulo gulo	Döppes 2001	Hohle Fels	Baden-Württemberg	Germany	Pleistocene
Gulo gulo	Döppes 2001	Hohlenstein	Nordrhein-Westfalen	Germany	Pleistocene
Gulo gulo	Döppes 2001	Höschhöhle	Bayern	Germany	Pleistocene
Gulo gulo	Döppes 2001	Irpfelhöhle	Bayern	Germany	Pleistocene
Gulo gulo	Döppes 2001	Kastlhänghöhle	Bayern	Germany	Pleistocene
Gulo gulo	Döppes 2001	Langenaltheim	Hamburg	Germany	Pleistocene
Gulo gulo	Döppes 2001	Meiendorf		Germany	Pleistocene
Gulo gulo	Döppes 2001	Moggasterhöhle		Germany	Pleistocene
Gulo gulo	Von Kahlke 1963	Mosbach	Weisbaden	Germany	Pleistocene				49.3° N, 9.1° E
Gulo schlosseri	Tobein 1957, Brüning 1980, von Koenigswald and Heinrich 1999	Mosbach 2 main fauna	Rheinland-Pfalz	Germany	middle Pleistocene	latest Cromerian (0.8 - 0.1 Ma)	0.1	0.8	50.1° N, 8.3° E
Gulo gulo	Döppes 2001	Munzingen	Baden-Württemberg	Germany	Pleistocene
Gulo gulo	Döppes 2001	Niederlehme	Brandenburg	Germany	Pleistocene
Gulo gulo	Döppes 2001	Oberneder-Höhle	Bayern	Germany	Pleistocene
Gulo gulo	Döppes 2001	Ofnethöhle	Baden-Württemberg	Germany	Pleistocene
Gulo gulo	Diedrich 2009	Perick		Germany	Pleistocene	Weichselian	0.01	0.115	51°15'16" N, 8°10'7" E
Gulo gulo	Döppes 2001	Petersfels		Germany	Pleistocene
Gulo gulo	Döppes 2001	Ramensteinhöhle	Baden-Württemberg	Germany	Pleistocene
Gulo gulo	Döppes 2001	Schussenquelle	Baden-Württemberg	Germany	Pleistocene
Gulo gulo	Döppes 2001	Sirgenstein	Baden-Württemberg	Germany	Pleistocene
Gulo gulo	Döppes 2001	Sporker Mulde	Nordrhein-Westfalen	Germany	Pleistocene
Gulo gulo	Döppes 2001	Sundwicker Höhle	Nordrhein-Westfalen	Germany	Pleistocene
Gulo gulo	Döppes 2001	Vogelherd		Germany	Pleistocene
Gulo gulo	Döppes 2001	Weinberghöhlen		Germany	Pleistocene
Gulo gulo	Döppes 2001	Zoolithenhöhle		Germany	Pleistocene		0.028905	0.035
Gulo gulo	Döppes 2001	Bervavölgyer		Hungary	Pleistocene
Gulo schlosseri	Kretzoi 1941	Gombaszög		Hungary	Pleistocene	late Biharian
Gulo gulo	Döppes 2001	Jankovich		Hungary	Pleistocene
Gulo gulo	Döppes 2001	Lengyel		Hungary	Pleistocene
Gulo gulo	Döppes 2001	Pálffy		Hungary	Pleistocene
Gulo gulo	Döppes 2001	Peskö		Hungary	Pleistocene
Gulo gulo	Döppes 2001	Pilisszántó		Hungary	Pleistocene
Gulo gulo	Döppes 2001	Puskaporos		Hungary	Pleistocene
Gulo gulo	Döppes 2001	Remetehegy		Hungary	Pleistocene
Gulo gulo	Döppes 2001	Ságvár		Hungary	Pleistocene
Gulo gulo	Döppes 2001	Subalyuk		Hungary	Pleistocene
Gulo gulo	Döppes 2001	Szegyestyl & Banlaka		Hungary	Pleistocene
Gulo gulo	Döppes 2001	Buco del Piombo		Italy	Pleistocene
Gulo gulo	Döppes 2001	Colombi bei La Spezzia		Italy	Pleistocene
Gulo gulo	Döppes 2001	Gavado		Italy	Pleistocene
Gulo gulo	Döppes 2001	Grimaldi		Italy	Pleistocene
Gulo gulo	Döppes 2001	Grotta dell’orso		Italy	Pleistocene				13° 43' 48'' E, 45° 43' 59'' N
Gulo gulo	Döppes 2001	Minore di San Bernadino		Italy	Pleistocene
Gulo gulo	Döppes 2001	Piana di Fornero		Italy	Pleistocene				45° 54' 23'' N, 8° 08' 13'' E
Gulo gulo	Döppes 2001	Viganti		Italy	Pleistocene
Gulo schlosseri	Kolfschoten 2001	Nieuwegein		Netherlands	Middle Pleistocene
Gulo schlosseri	Nadachowshi et al 2011	Żabia Cave	Częstochowa Upland	Poland	early Pleistocene	early Biharian (MQ1)	1.3	1.7	50°34'25" N, 19°31'11" E
Gulo schlosseri	Terzea 1996	Betfia 7 (aka Somleu Hill)		Romania	early and middle Pleistocene	middle Waalian (~1.3 Ma) to Gracial A of Cromerian (~0.7 Ma)	~0.7	~1.3	47.0° N, 22.0° E
Gulo gulo	Sher 1971	Kolyma River	Respublika Saha (Jakutija)	Russia	late Pleistocene				68.8° N, 160.0° E
Gulo minor	Sotnikova 1982, Sotnikova and Kalmykov 1991, Sotnikova 2010	Udunga (lower Adycha River)	Western Transbaikalia	Russia	middle Pliocene	MN16a	3.1	3.6	51°24' N, 105°54' E
Gulo sp.	Erbaeva 1986	Zasuchino	Western Transbaikalia	Russia	early Pleistocene	post-Villafranchian			51.8° N, 108.5° E
Gulo gulo	Döppes 2001	Jama velikih podkornjakov		Slovenia	Pleistocene	late Glacial			13° 53' E, 45° 34' N
Gulo gulo	Döppes 2001	Kostanjevica na krasu		Slovenia	Pleistocene				13° 39' E, 45° 52' N
Gulo gulo	Döppes 2001	Križna jama		Slovenia	Pleistocene		448	0.0467	14° 33' E, 46° 18' N
Gulo gulo	Döppes 2001	Ludvikova jama		Slovenia	Pleistocene				13° 51' E, 45° 41' N
Gulo gulo	Döppes 2001	Potočka zijalka		Slovenia	Pleistocene		0.02913	0.0326	14° 40' E, 46° 26' 08'' N
Gulo gulo	Döppes 2001	Lezetxiki	Guipúzcoa	Spain	Pleistocene				2° 31' 55'' W, 43° 05' 20'' N
Gulo gulo	Döppes 2001	Mairuelegorreta XI	Alava	Spain	Pleistocene				0° 55' 50'' W, 43° 10' 20'' N
Gulo gulo	Döppes 2001	Grotte de Cotencher	Neuenburg	Switzerland	Pleistocene
Gulo gulo	Döppes 2001	Kesslerloch oder Knochenhöhle von Thayngen	Schaffhausen	Switzerland	Pleistocene
Gulo gulo	Döppes 2001	Rislisberg-Höhle	Solothurn	Switzerland	Pleistocene
Gulo gulo	Döppes 2001	Schnurenloch	Bern	Switzerland	Pleistocene
Gulo gulo	Döppes 2001	Sulzfluh-Höhle	Graubünden	Switzerland	Pleistocene
Gulo gulo	Döppes 2001	Untere Bsetzi	Schaffhausen	Switzerland	Pleistocene
Gulo gulo	Newton 1882	Mundesley	England	United Kingdom	middle Pleistocene	Cromerian			52.9° N, 1.4° E
Gulo gulo	Sutcliffe et al 1985	Stump Cross Cave	England	United Kingdom	late Pleistocene		0.083		54.06°N, 1.03°W
Gulo gulo	Stuart 1986	Tornewton Cave	England	United Kingdom	late Pleistocene				50.1° N, 3.7° W
