# Supplementary material for: A new species of Gulo from the Early Pliocene Gray Fossil Site (Eastern United States); rethinking the evolution of wolverines
Source: PeerJ. 2018 Apr 18;6:e4648. doi: 10.7717/peerj.4648 (PMC5910791; doi:10.7717/peerj.4648)
Supplement: Table S2 — Data were derived from measurements of specimens and consultation of cited literature sources. [file peerj-06-4648-s003.xlsx]

## Sheet: Gulonine upper dentition
				Notes	P2		P4			M1
Species	Specimen #	Reference	Locality		L	W	L	Wpro	Wmet	Lext	Lint	W	P2L/P4L	P4Wpro/L	P4Wmet/L	P4L/M1Lint
Gulo sudorus	ETMNH 3663		Gray Fossil Site		7.93	6.05	21.2	13.19	8.19				0.374057	0.62217	0.386321
Gulo gulo	ETVP 5258				6.82	5.29	21.43	12.27	8.07	7.13	7.74	14.01	0.318245	0.572562	0.376575	2.76873
Gulo gulo	ETVP 5498				6.87	4.51	20.7	11.56	8.01	6.16	7.63	13.64	0.331884	0.558454	0.386957	2.71298
Gulo gulo	ETMNH CC290				6.1	4.7	19.7	10.78	8.06	7.28	7.54	13.99	0.309645	0.547208	0.409137	2.61273
Gulo gulo	ETMNH CC269				7.27	5.26	21.7	12.06	8.49	7.39	8.64	14.92	0.335023	0.55576	0.391244	2.51157
Gulo gulo	ETVP 2962				6.3	4.9	19.62	10.85	7.28	6.73	7.29	13.02	0.321101	0.553007	0.37105	2.69136
Gulo gulo	UCLA 15301		Alaska		6.81	4.74	21.96	12.71	8.42	7.28	8.74	14.37	0.310109	0.57878	0.383424	2.51259
Gulo gulo	USNM 81799		Idaho		6.96	4.46	20.45	12.1	7.34	6.7	7.78	12.88	0.340342	0.591687	0.358924	2.62853
Gulo gulo	USNM 157237		Alaska		7.21	4.71	20.44	11.36	8.1				0.35274	0.555773	0.396282
Gulo gulo		Anderson 1998	Moonshiner Cave	Mean	6.49	4.43	20.12						0.322565
Gulo gulo		Anderson 1998		Max	7	5	22.2	12.9			8.7	14.2	0.315315	0.581081		2.55172
Gulo gulo		Anderson 1998		Min	5.8	3.6	18	9.4			6.6	11.9	0.322222	0.522222		2.72727
Gulo gulo		Anderson 1998	Middle Butte Cave	Mean	6.27	4.4	20.02						0.313187
Gulo gulo		Anderson 1998		Max	6.9	4.7	21.5	12.1			8.1	13.8	0.32093	0.562791		2.65432
Gulo gulo		Anderson 1998		Min	5.7	3.9	18	9.6			7	11.8	0.316667	0.533333		2.57143
Gulo gulo		Anderson 1998	Grasshopper Trail	Mean			19	12.5			6.9	13.7		0.657895		2.75362
Gulo gulo		Anderson 1998	Booth Canyon	Mean			22.7	13.7			8.3	14.7		0.603524		2.73494
Gulo gulo		Anderson 1998	Recent Male	Mean			21.62
Gulo gulo		Anderson 1998		Max			23	12.9			8.9	15		0.56087		2.58427
Gulo gulo		Anderson 1998		Min			20.7	11.5			8	13.8		0.555556		2.5875
Gulo gulo		Anderson 1998	Recent Female	Mean			19.57
Gulo gulo		Anderson 1998		Max			19.3	10.7			8.1	13.8		0.554404		2.38272
Gulo gulo		Anderson 1998		Min			20.1	12.1			6.8	12.3		0.60199		2.95588
Gulo gulo (Pleistocene)	USNM V8175		Cumberland Cave, Maryland				18.9	11	7.3					0.582	0.386243
Gulo gulo (Pleistocene)	USNM V8176		Cumberland Cave, Maryland		7.38	4.9	21.84	11.65	8.5	6.98	9.18	14.46	0.338	0.533	0.389194	2.37908
Gulo schlosseri		Bonifay 1971	Grotte de l'Escale, France		6.3	4.5	18.2	10.3		6		13.2	0.346154	0.565934
Gulo schlosseri		Krajcarz 2011	Deszczowa Cave, Poland				19.5	11.8	6.8					0.605128	0.348718
Gulo gulo		Kurten 1973	Tornewton Cave, England				19.1	10.7	7.2					0.560209	0.376963
Gulo gulo		Kurten 1973	Tornewton Cave, England				20	12	7.3	6.1	7.9	13.6		0.6	0.365	2.53165
Gulo gulo (Pleistocene)	ZIN 37282	Baryshnikov 2015	Geographical Society Cave, Russia		7.7	4.8	22.6	13.4					0.340708	0.59292
Gulo gulo (Pleistocene)	ZIN 37283	Baryshnikov 2015	Geographical Society Cave, Russia				22.5	11.6						0.515556
Gulo gulo (Pleistocene)	ZIN 37281	Baryshnikov 2015	Geographical Society Cave, Russia		6.6	4.7	21.1	12.7					0.312796	0.601896
Gulo gulo (Pleistocene)	ZIN 34907	Baryshnikov 2015	Berelekh River, Yakutia, Russia				23.1	13.1						0.5671
Gulo gulo (Pleistocene)	NHM 21 (o.c.)	Baryshnikov 2015	Gailenreuth Germany		7.7	5.2
Gulo gulo (Pleistocene)	NHMP R2531	Baryshnikov 2015	Chlupacova slug, Konepruse, Czech Republic		7.8	5.2	22.6	11.2					0.345133	0.495575
Gulo gulo(Pleistocene)	AH1	Döppes 2001			7.5	5	21.8	13.2		6		16.6	0.344037	0.605505
Gulo gulo(Pleistocene)	BM	Döppes 2001			7.8	5.1	22.5	12.4				14.1	0.346667	0.551111
Gulo gulo(Pleistocene)	GL25,1	Döppes 2001					20	12		6.5		13		0.6
Gulo gulo(Pleistocene)	GL25,2	Döppes 2001					22	12		7		14		0.545455
Gulo gulo(Pleistocene)	GL25,7	Döppes 2001					23	13		7.5		15		0.565217
Gulo gulo(Pleistocene)	GO	Döppes 2001			7.2	4.7	23.9	14.1		6.7			0.301255	0.589958
Gulo gulo(Pleistocene)	HST	Döppes 2001					22.7	13.1		8.45		14.8		0.577093
Gulo gulo(Pleistocene)	KnK	Döppes 2001					21.7	12.4		7.8		15		0.571429
Gulo gulo(Pleistocene)	Lj1	Döppes 2001			7.2	5.5	23.2	14.1					0.310345	0.607759
Gulo gulo(Pleistocene)	Lj2	Döppes 2001			7.9	5.2
Gulo gulo(Pleistocene)	Lj3	Döppes 2001					23.2	14.1						0.607759
Gulo gulo(Pleistocene)	Lz II	Döppes 2001					21.2	12.4						0.584906
Gulo gulo(Pleistocene)	Miz 3000/03/003	Döppes 2001					22.8	13.9						0.609649
Gulo gulo(Pleistocene)	Pr F3	Döppes 2001			7.7	4.9	22.8	13.5					0.337719	0.592105
Gulo gulo(Pleistocene)	NHMW	Döppes 2001			6.6	4.3	20.9	11.5					0.315789	0.550239
Gulo gulo(Pleistocene)	PS	Döppes 2001			6.98	5	21.7	13.1					0.321659	0.603687
Gulo gulo(Pleistocene)	SH Fragment	Döppes 2001			7.3	4.7	23.9	14.4					0.305439	0.60251
Gulo gulo(Pleistocene)	SH Vitrine	Döppes 2001			7.5	4.5	20.6	11.6					0.364078	0.563107
Gulo gulo(Pleistocene)		Döppes 2001			6.35	4.8	19.7	12.1					0.322335	0.614213
Gulo gulo(Pleistocene)	SO	Döppes 2001			6.3	4.62	20	12.2					0.315	0.61
Gulo gulo(Pleistocene)	Sy	Döppes 2001					22	13						0.590909
Gulo gulo(Pleistocene)	TF	Döppes 2001					21.5	12.3						0.572093
Gulo gulo(Pleistocene)	Wa MK977	Döppes 2001					23	13						0.565217
Gulo gulo(Pleistocene)	Z GL 77/202	Döppes 2001			7.4	5	23	13.4					0.321739	0.582609
Gulo gulo(Pleistocene)	Z GL 77/203	Döppes 2001			7.1	4.3	22.9	13.5					0.310044	0.58952
Gulo gulo(Pleistocene)	Z GL77	Döppes 2001			7.5	4.6	22.5	13.3					0.333333	0.591111
Gulo gulo(Pleistocene)	Z GL78	Döppes 2001			7.3	4.9	22.9	13.4					0.318777	0.585153
Gulo gulo(Pleistocene)	Z M 473	Döppes 2001			6.7	4.6	21	11.5					0.319048	0.547619
Gulo gulo(Pleistocene)	Z MS/76/7	Döppes 2001			6.8	5	21	13					0.32381	0.619048
Gulo gulo(Pleistocene)	Z 435	Döppes 2001					21.5	13						0.604651
Gulo gulo(Pleistocene)	Z 434	Döppes 2001					21.4	14.2						0.663551
Gulo gulo	1317	Döppes 2001		F	6.9	4.2	18.48	10.9	7.2				0.373377	0.589827	0.38961
Gulo gulo	7811	Döppes 2001		F	6	3.8	18.1	10.7					0.331492	0.59116
Gulo gulo	1349	Döppes 2001		F	5.4	3.7	17.8	10.8					0.303371	0.606742
Gulo gulo	B1595	Döppes 2001		F	6.2	4	18.6	11	6.7				0.333333	0.591398	0.360215
Gulo gulo	B197	Döppes 2001		F	6	4.1	18.7	10.4	6.4				0.320856	0.55615	0.342246
Gulo gulo	B223	Döppes 2001		F	5.9	4.9	17.8	10.3	6.6				0.331461	0.578652	0.370787
Gulo gulo	B6636	Döppes 2001		F	6.2	4.2	18.55	11.35	6.3				0.334232	0.61186	0.339623
Gulo gulo	B7305	Döppes 2001		F	6.4	3.9	19.1	10.9	6.5				0.335079	0.570681	0.340314
Gulo gulo	B7311	Döppes 2001		F	5.8	4.1	18.6	10.8	7				0.311828	0.580645	0.376344
Gulo gulo	BM4540	Döppes 2001		F	6.1	4	18.65	10.45	6.7				0.327078	0.560322	0.359249
Gulo gulo	BM4545	Döppes 2001		F	6.2	4	17.7	10.5	6.3				0.350282	0.59322	0.355932
Gulo gulo	1325	Döppes 2001		M	6.7	4.35	19.65	11.58					0.340967	0.589313
Gulo gulo	3713	Döppes 2001		M	6.4	4.5	21.1	12.2					0.303318	0.578199
Gulo gulo	22772	Döppes 2001		M	6.5	4.3	20.6	11.6					0.315534	0.563107
Gulo gulo	40922	Döppes 2001		M	7.1	4.5	19.9	11.5					0.356784	0.577889
Gulo gulo	NHMW -	Döppes 2001		M	5.6	4.2	18	10.7					0.311111	0.594444
Gulo gulo	B1487	Döppes 2001		M	6.2	4.35	20.4	12.2	7.1				0.303922	0.598039	0.348039
Gulo gulo	B19	Döppes 2001		M			20.8
Gulo gulo	B224	Döppes 2001		M			19.5
Gulo gulo	B24	Döppes 2001		M			19.2
Gulo gulo	B266	Döppes 2001		M			19.1
Gulo gulo	B331	Döppes 2001		M	6.4	4.5	20.25	11.8	7.6				0.316049	0.582716	0.375309
Gulo gulo	B332	Döppes 2001		M	6.2	4.4	20.05	11.8	7.5				0.309227	0.588529	0.374065
Gulo gulo	B334	Döppes 2001		M	6.9	4.3	21.4	13.2	7.9				0.32243	0.616822	0.369159
Gulo gulo	B511	Döppes 2001		M			19.7
Gulo gulo	B514	Döppes 2001		M			20.5
Gulo gulo	B523	Döppes 2001		M			19.7
Gulo gulo	B528	Döppes 2001		M			20.15
Gulo gulo	B617	Döppes 2001		M			19.75
Gulo gulo	B618	Döppes 2001		M			21.5
Gulo gulo	B620	Döppes 2001		M			20.3
Gulo gulo	B622	Döppes 2001		M			20.7
Gulo gulo	B623	Döppes 2001		M			20.3
Gulo gulo	B626	Döppes 2001		M			21.1
Gulo gulo	B683	Döppes 2001		M			20.1
Gulo gulo	B702	Döppes 2001		M			20.5
Gulo gulo	B7304	Döppes 2001		M	6.7	4.15	20.3	11.4	6.8				0.330049	0.561576	0.334975
Gulo gulo	B7310	Döppes 2001		M	6.4	4.1	19.8	11.65	6.95				0.323232	0.588384	0.35101
Gulo gulo	B895	Döppes 2001		M			19.9
Gulo gulo	B931	Döppes 2001		M			20.1
Gulo gulo	B951	Döppes 2001		M			20.5
Gulo gulo	BM4472	Döppes 2001		M			20.5
Gulo gulo	BM4486	Döppes 2001		M			21
Gulo gulo	BM4490	Döppes 2001		M	6.3	4.3	19.7	12.1	7.4				0.319797	0.614213	0.375635
Gulo gulo	BM4491	Döppes 2001		M	6.4	4.25	20	11.8	6.6				0.32	0.59	0.33
Gulo gulo	BM4536	Döppes 2001		M			21
Gulo gulo	BM4663	Döppes 2001		M			20.6
Gulo gulo	1902/56	Döppes 2001		M	6.5	4.1	19.7	10.2	6.6				0.329949	0.517766	0.335025
Gulo gulo	1973/25	Döppes 2001		M	6.2	4.4	20.1	11.9	7.2				0.308458	0.59204	0.358209
Gulo gulo	AM/784	Döppes 2001		M	7.8	4.3	19.4	12	6.6				0.402062	0.618557	0.340206
Pekania occulta	JODA 15214		Rattlesnake Fm. OR			3	13.25	8.78	5.31	5.56	8.54	12.84		0.662642	0.400755	1.55152
P. pennanti	LACM54254			M	6.42	2.87	13.36	6.92	4.82	5.78	7.6	11.47	0.480539	0.517964	0.360778	1.75789
	LACM92389			M	6.01	2.89	12.2	7.6	4.84	6.09	7.59	10.94	0.492623	0.622951	0.396721	1.60738
	LACM92392			M	6.25	2.96	12.19	7.53	4.91	6.47	7.11	11.51	0.512715	0.617719	0.402789	1.71449
P. pennanti	MVZ 29809			M	5.76	3.09	12.01	7.88	4.72	6.41	7.38	10.6	0.4796	0.65612	0.393006	1.62737
P. pennanti	MVZ 29811			M	5.09	2.82	11.97	7.49	4.67	5.9	7.07	10.37	0.42523	0.625731	0.390142	1.69307
P. pennanti	MVZ 23883			M	5.78	3.06	12.6	7.41	4.63	6.26	7.71	10.93	0.45873	0.588095	0.36746	1.63424
P. pennanti	MVZ 23884			M	5.25	3.07	12.4	7.69	4.31	6.52	7.4	10.69	0.423387	0.620161	0.347581	1.67568
P. pennanti	MVZ 196716			M	5.75	3.07	12.02	7	4.56	6.02	7.72	11.07	0.478369	0.582363	0.379368	1.55699
P. pennanti	MVZ 23668			M	5.9	3.18	11.82	6.82	4.4	5.91	7.77	11.05	0.499154	0.576988	0.37225	1.52124
P. pennanti	MVZ 24740			M	5.72	3.14	12.16	7.59	4.65	6.16	7.18	10.6	0.470395	0.624178	0.382401	1.69359
P. pennanti	MVZ 21396			M	5.65	3.07	12.33	7.62	4.54	6.48	7.57	11.01	0.458232	0.618005	0.368208	1.6288
P. pennanti	MVZ 165960			M	5.15	2.75	11.74	7.48	4.35	5.93	7	10.05	0.438671	0.637138	0.370528	1.67714
P. pennanti	MVZ 23686			F	4.94	3.02	10.51	5.83	3.58	5.52	5.79	8.43	0.470029	0.55471	0.340628	1.8152
P. pennanti	MVZ 12901			F	4.7	2.41	10.77	6.23	3.69	4.87	5.47	8.64	0.436397	0.578459	0.342618	1.96892
P. pennanti	MVZ 31133			F	5.08	2.6	10.5	5.71	3.68	5.85	6.31	9.14	0.48381	0.54381	0.350476	1.66403
P. pennanti	MVZ 185230			F	5.51	2.65	10.79	6.61	3.73	4.89		9.48	0.510658	0.612604	0.34569
P. pennanti	MVZ 31093			F	5.16	2.49	11.05	7.17	3.91	5.3	6.46	9.49	0.466968	0.648869	0.353846	1.71053
P. pennanti	MVZ 31129			F	5.43	2.44	11.12	6.4	3.84	5.3	6.06	9.21	0.488309	0.57554	0.345324	1.83498
P. pennanti	MVZ 186283			F	5.13	2.54	10.97	6.62	3.76	5.28	6.36	9.48	0.467639	0.603464	0.342753	1.72484
P. pennanti	MVZ 29812			F	5.13	2.71	11	6.93	3.9	5.68	6.43	9.54	0.466364	0.63	0.354545	1.71073
P. pennanti	MVZ 29813			F	5.36	2.6	10.48	6.81	3.91	5.52	6.07	9.18	0.51145	0.649809	0.373092	1.72652
P. pennanti	MVZ 184105			F	4.66	2.04	9.98	6.19	3.34	5.05	6.04	9.06	0.466934	0.62024	0.334669	1.65232
P. diluviana		Gidley and Gazin 1933	Cumberland Cave, MD				10.2	6	3.9	5	6	9.5		0.588235	0.382353	1.7
P. diluviana		Gidley and Gazin 1933	Cumberland Cave, MD							5.65	6.46
P. palaeosinensis		Wang et al. 2012	Baode, China	min.	4.2	1.9	9	4.6		5.2		8.5	0.466667	0.511111
		Wang et al. 2012		max.	5.7	2.5	11.5	6.7		7.6		10.9	0.495652	0.582609
		Wang et al. 2012		mean	5.12	2.32	10.54	6.07					0.485769	0.575901
	PMU 3793		Baode, China			2	11	6.4	4	5.7	6.5	10.4		0.581818		1.69231
	IVPP V 18408		Baogeda Ula, China		5.8	2.19	12.38	6.29	3.95				0.468498	0.508078	0.319063
Martes americana	UCLA 8487				4.22	2.18	8.93	5.73	3.27	4.68	6.61	9.36	0.472564	0.641657	0.366181	1.35098
	UCLA 8490				4.8	2.23	8.86	5.43	3.51	4.35	6.64	9.32	0.541761	0.612867	0.396163	1.33434
	UCLA 9978				5.15	1.97	9.17	5.8	3.51	3.89	6.34	9.18	0.561614	0.632497	0.38277	1.44637
	UCLA D159				4.13	2.13	7.61	4.79	2.72	3.4	4.9	7.41	0.542707	0.629435	0.357424	1.55306
	ETMNH CC609				4.34	2	7.23	4.67	2.74				0.600277	0.64592	0.378976
	ETMNH CC603				4.24	1.72	7.09	4.54	2.55				0.598025	0.640339	0.359661
	ETMNH CC607				4.61	2	7.66	4.57	2.68				0.601828	0.596606	0.349869
	NAUQSP 2013				4.13	2.13	7.76	4.52	2.85				0.532216	0.582474	0.367268
	NAUQSP 2015				4.25	2.16	7.67	4.83	2.98				0.554107	0.629726	0.388527
	NAUQSP 2017				4.6	1.93	7.36	4.67	2.55				0.625	0.634511	0.346467
	ETVP 166				3.21	1.57	6.5	3.9	1.9				0.493846	0.6	0.292308
M. martes	LACM 74508				5.34	2.78	9.25	6.12	3.36	4.72	7.81	9.55	0.577297	0.661622	0.363243	1.18438
M. flavigula	LACM 8229				5.22	2.6	10.11	6.42	3.48	4.02	5.31	9.57	0.51632	0.635015	0.344214	1.90395
M. foina	ETVP 5535				4.1	2.43	9.37	5.83	3.36	5.2	5.55	9.22	0.437567	0.622199	0.358591	1.68829
M. ginsburgi		Montoya et al. 2011	Venta del Moro, Spain				8.9	5.7			5.4	8.3		0.640449		1.648
M. wenzensis		Stach 1959	Węże 1, Poland		5.8	3	12		5.2		6.6	10.5	0.483333		0.433333	1.81818
Eira barbara	UCLA 19365		Oaxaca, Mexico		4.311	2.863	10.62	7.167	3.577				0.405932	0.674859	0.336817
Eira barbara	LACM 10078				3.58	2.558	9.225	6.851	3.846				0.388076	0.742656	0.416911
Eira barbara	LACM 13751				3.923	3.043	10.345	7.492	3.664				0.379217	0.724215	0.354181
Eira barbara	LACM 32060				4.135	2.856	10.613	6.473	3.578				0.389617	0.609912	0.337134
Eira barbara	ETVP 7233			F	3.3	2.88	9.52	6.51	3.62				0.346639	0.683824	0.380252
Sminthosinis bowleri	UMMP V52868	Bjork 1970	Hagerman, Idaho		5.38	2.15	9.6	5.35	4.76	7.47			0.560417	0.557292	0.495833
Sminthosinis bowleri	UMMP V525214	Bjork 1970	Hagerman, Idaho		4.98		9.65	5		7.3			0.516062	0.518135
Ischyrictis zibethoides	8059	Peigné 2012	Sandelzhausen, Germany				14	7.9	4.6					0.564286	0.328571
Ischyrictis zibethoides	8044	Peigné 2012	Sandelzhausen, Germany				16.5	11	6.6		9	15.5		0.666667	0.4	1.83333
Ischyrictis zibethoides	Sa 4668-70	Peigné 2012	Sansan, France		8.5	4.6	17.8	12		7.4	9.9	16.5	0.477528	0.674157		1.79798
Ischyrictis zibethoides	Sa 15518-19	Peigné 2012	Sansan, France				15.5	9.5		6.65	6.85	13.75		0.612903		2.26277
Plesiogulo marshalli		Harrison 1981	Edson				19.4	13.5		9.9	14.4	18.5		0.695876		1.34722
Plesiogulo marshalli		Harrison 1981	Optima				20.9	14.3		8.3	15.9	18		0.684211		1.31447
Plesiogulo marshalli		Harrison 1981	Coffee Ranch	Range	8.0 - 8.2	5.7 - 5.9	18.5 - 21.7	12.1 - 15.0		8.4-10.3	13.0-16.3	16.7-19.9
				Mean	8.1	5.8	19.5	13.2		9.2	14.7	18.1	0.415385	0.676923		1.32653
Plesiogulo marshalli		Harrison 1981	McKay				19.7	12.7		8.8	13.9	17		0.64467		1.41727
Plesiogulo marshalli	UF 19253		Bone Valley				22.04	14.11	9.8	11.87	12.6	18.31		0.6402	0.444646	1.74921
	UF 19295		Bone Valley							10.92	12.45	17.79
Plesiogulo marshalli	FAM 49230		San Juan Quarry				18.49	12.08	7.81	9.3	13.2	16.2		0.653326	0.42239	1.40076
Plesiogulo marshalli		Harrison 1981	Lost Quarry				18.2	12.4						0.681319
Plesiogulo marshalli	FAM 23386		Miami Quarry		7.84	5.88	18.81	13.07	8.17	10.07	15.19	17.28	0.4168	0.694843	0.434343	1.23831
Plesiogulo lindsayi		Harrison 1981	Wikieup	Range	9.3 - 9.7	6.6 - 7	23.5	17.3		9.4-10.2	13.3-15.5	2.0-2.15		0.73617
				Mean	9.5	6.9				9.7	14.6	20.6	0.404255	0.73617		1.60959
Plesiogulo lindsayi		Harrison 1981	Old Cabin Quarry			6.6				11.2	15.1	19.7
Plesiogulo crassa		Kurten 1970	Baode, China	Range	7.8 - 8.3		18.3 - 20.8	12.3 - 14.2		7.6-9	11.9-14.8	15.8-17.8
		Kurten 1970	Baode, China	Mean	8.15	5.9	19.48	12.92		8.4	13.22	16.98	0.418378	0.663244		1.47352
Plesiogulo praecocidens		Kurten 1970	M 19 loc. 49				17.2	10.9						0.633721
Plesiogulo crassa		Kurten 1970	Spec. 11 loc. 49				20.5	14						0.682927
Plesiogulo cf. crassa		Kurten 1970	Pavlodar				15.7	11						0.700637
Plesiogulo minor		Kurten 1970	K'ingyang (type)				17	10.5						0.617647
Plesiogulo crassa		Kurten 1970	Yushe (type)				18.5	13.8						0.745946
?Plesiogulo sp.		Kurten 1970	Yushe				14.3	8.3						0.58042
Plesiogulo botori		Haile-Selassie et al. 2004					24.5	16.7		10.1	15.9	21.2		0.681633		1.54088
Plesiogulo monspessulanus		Hendey 1978			9.7	7.2	23.2	15.6			15.4	18.6	0.418103	0.672414		1.50649
Plesiogulo brachygnathus		Zdansky 1924			7.6	5.8	19.3	12.8		11.7	13.3	16.6	0.393782	0.663212		1.45113
Plesiogulo brachygnathus		Zdansky 1924			8.9	6.7	20.5	13.7			16.3		0.434146	0.668293		1.25767
Plesiogulo brachygnathus		Zdansky 1924			7.8	5.9	19.3	12.9					0.404145	0.668394
Plesiogulo brachygnathus		Zdansky 1924			8.2			12.8		10	14	17.2
Plesiogulo brachygnathus		Zdansky 1924					17.1	11.1		8.8	12.4	13.8		0.649123		1.37903
Plesiogulo brachygnathus		Zdansky 1924			7.6	5.2	18.3	12.8		8.7	12	15.7	0.415301	0.699454		1.525
Plesiogulo brachygnathus		Zdansky 1924			7.8						12.9	18.4
Plesiogulo brachygnathus		Zdansky 1924			8.3	6.2	20.1	13.5		10.6	14.9	17.3	0.412935	0.671642		1.34899
Plesiogulo brachygnathus		Zdansky 1924			8.1	5	19	11.9		8.4	12	16.6	0.426316	0.626316		1.58333
Plesiogulo brachygnathus		Zdansky 1924			8.5	5.7	19.1	13.2		9.5	12.9	16.9	0.445026	0.691099		1.48062
Plesiogulo brachygnathus		Zdansky 1924			8.7	6.3	20.5	14		9.5	14.7	19.4	0.42439	0.682927		1.39456
Iberictis azanzae	holotype	Ginsburg and Morales 1992	Artesilla, Spain				15.5	9.7			10.9	16		0.625806		1.42202
